# Supplementary material for: Side-by-Side Comparison of Five Chelators for 89Zr-Labeling of Biomolecules: Investigation of Chemical/Radiochemical Properties and Complex Stability
Source: MDPI journal article supplement (doi:10.3390/cancers13246349), 2021-12-17
Supplement: s1 [file s1]

*Supplementary Materials*

# Side-By-Side Comparison of Five Chelators for $^{89}\text{Zr}$ -Labeling of Biomolecules: Investigation of Chemical/Radiochemical Properties and Complex Stabi

Helen Damerow, Ralph Hübner, Benedikt Judmann, Ralf Schirmacher, Björn Wängler, Gert Fricker and Carmen Wängler

**File S1.** NMR Spectra, results of DFT calculations and radio-iTLC analyses

## Content

|                                                                                                                                      |            |
|--------------------------------------------------------------------------------------------------------------------------------------|------------|
| NMR spectra of <b>1</b> , <b>3</b> , <b>4</b> , <b>26</b> and <b>27</b>                                                              | pages 2–6  |
| DFT-optimized complex geometries of Zr- <b>1</b> – Zr- <b>5</b> , reacted with model TCO and corresponding cartesian xyz-coordinates | pages 7–20 |
| Results of radio-iTLC analyses of [ $^{89}\text{Zr}$ ]Zr- <b>31</b> and [ $^{89}\text{Zr}$ ]Zr- <b>32</b>                            | page 21    |

## NMR spectra

## DFO tetrazine 1

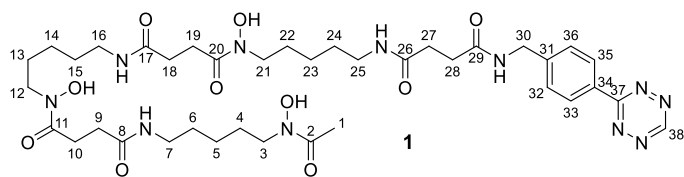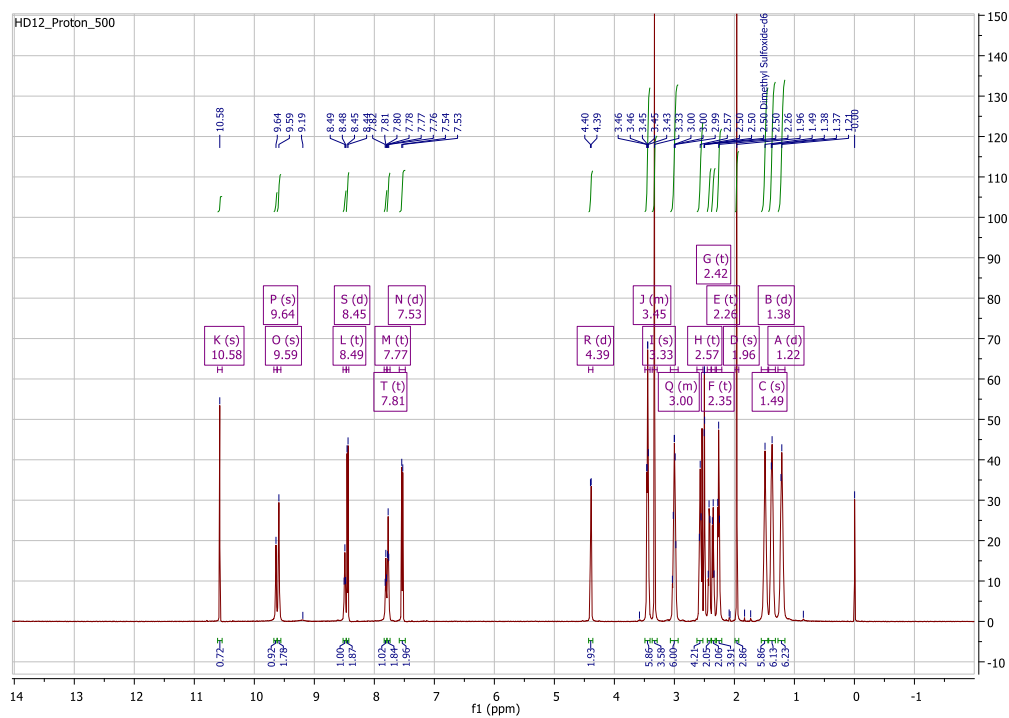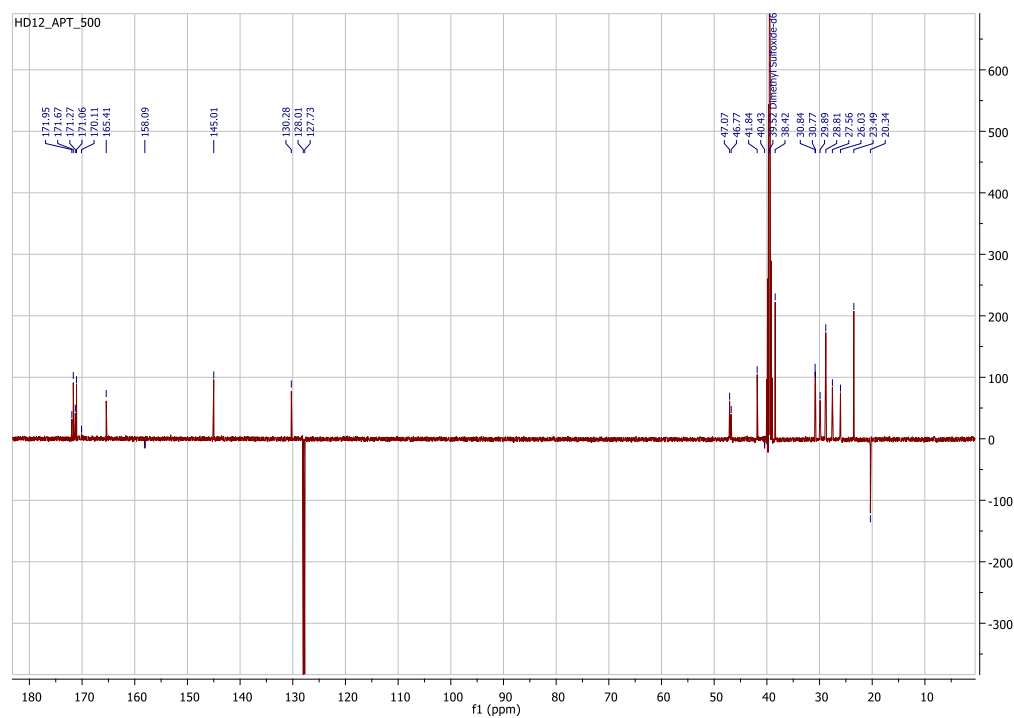

## DFO\* tetrazine 3

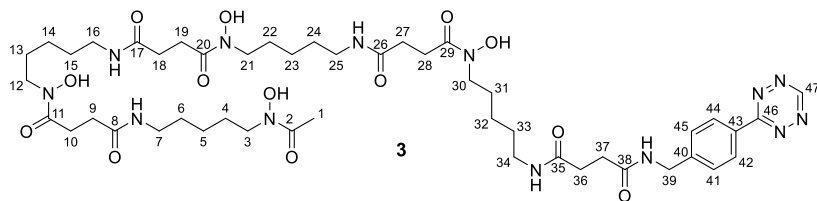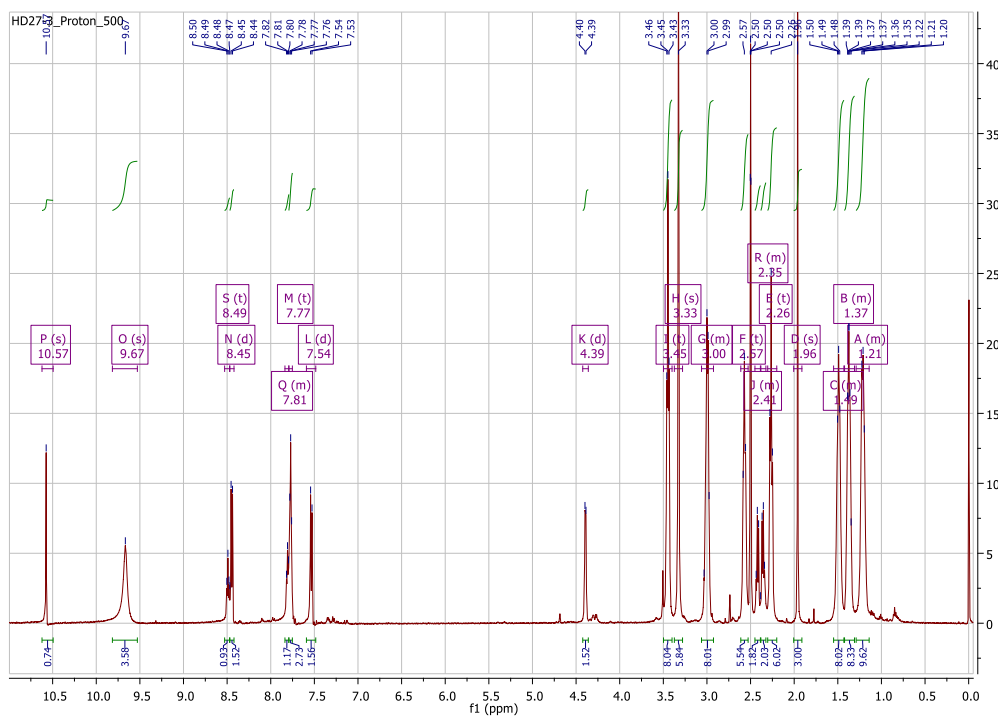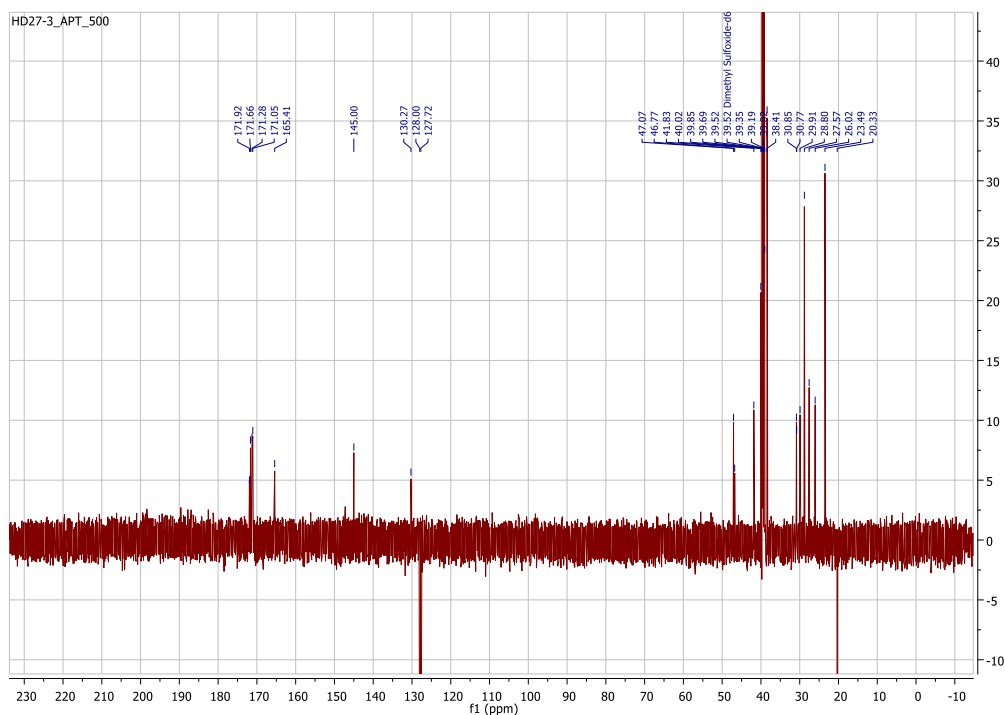

### 3,4,3-(LI-1,2-HOPOBn)-Ph-NH-Boc 26

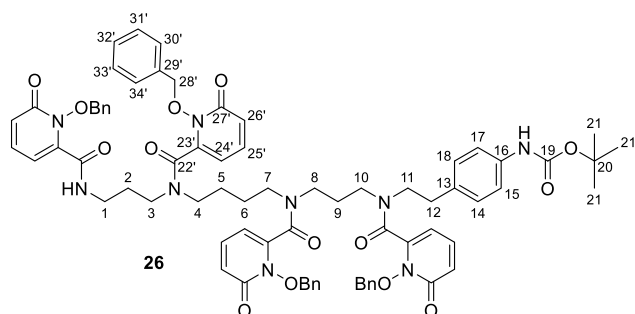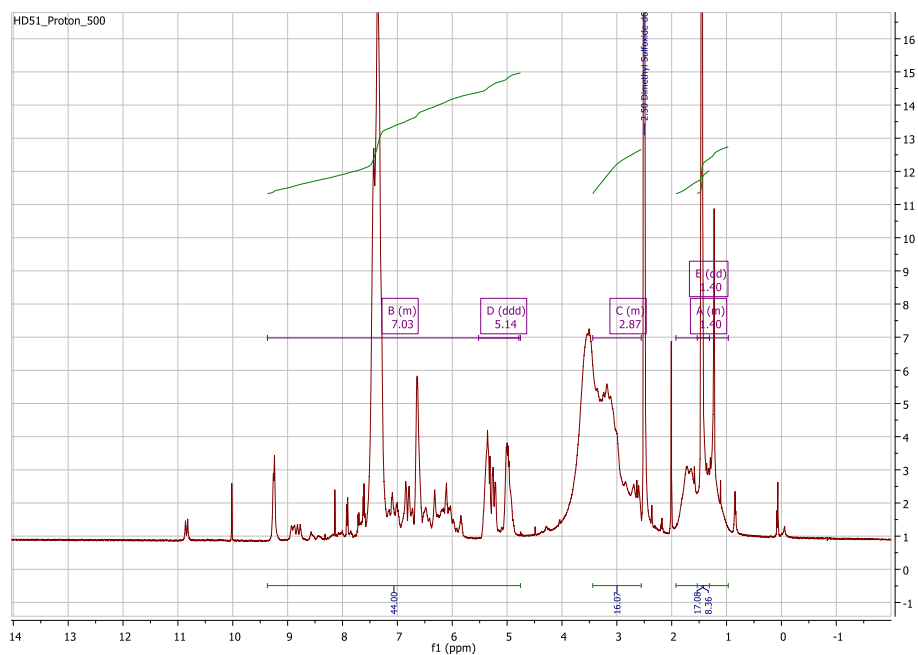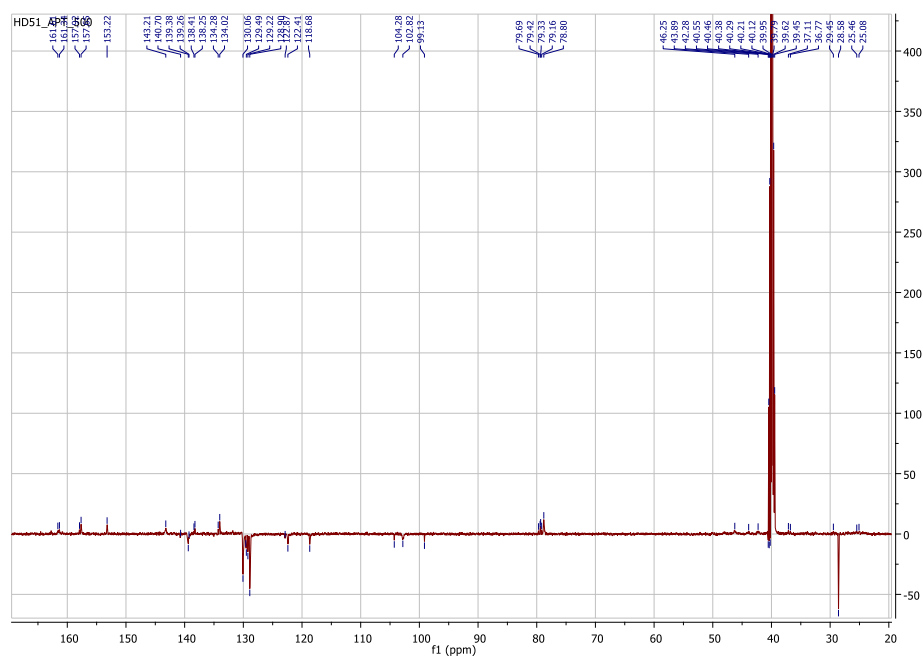

3,4,3-(LI-1,2-HOPOBn)-Ph-NH<sub>3</sub>Cl 27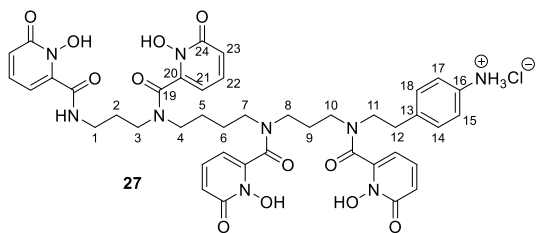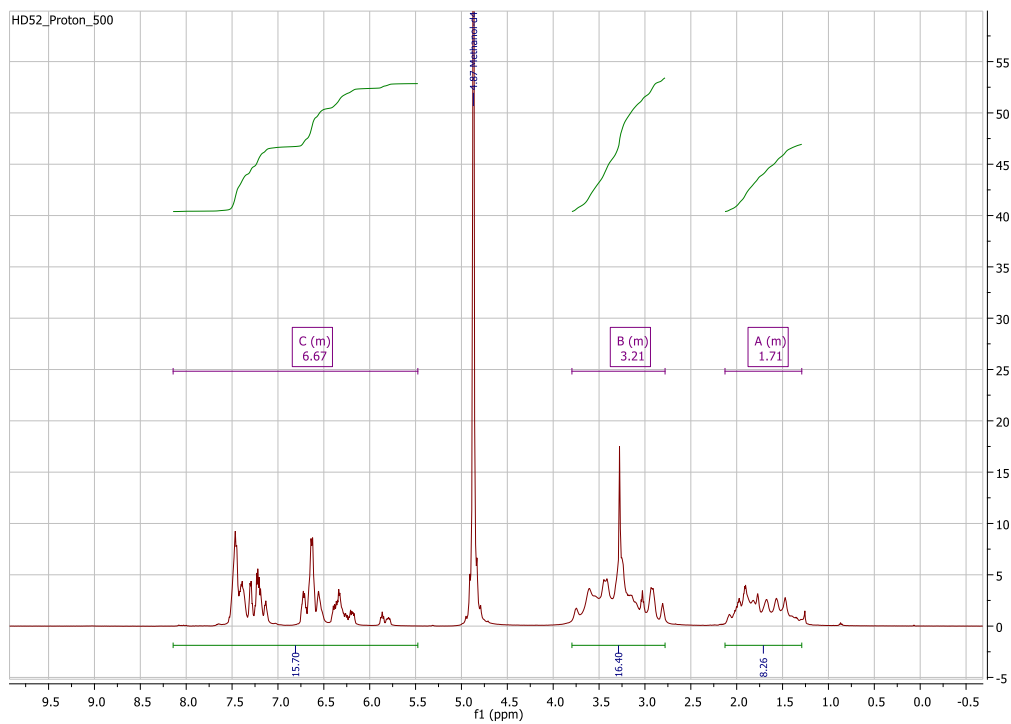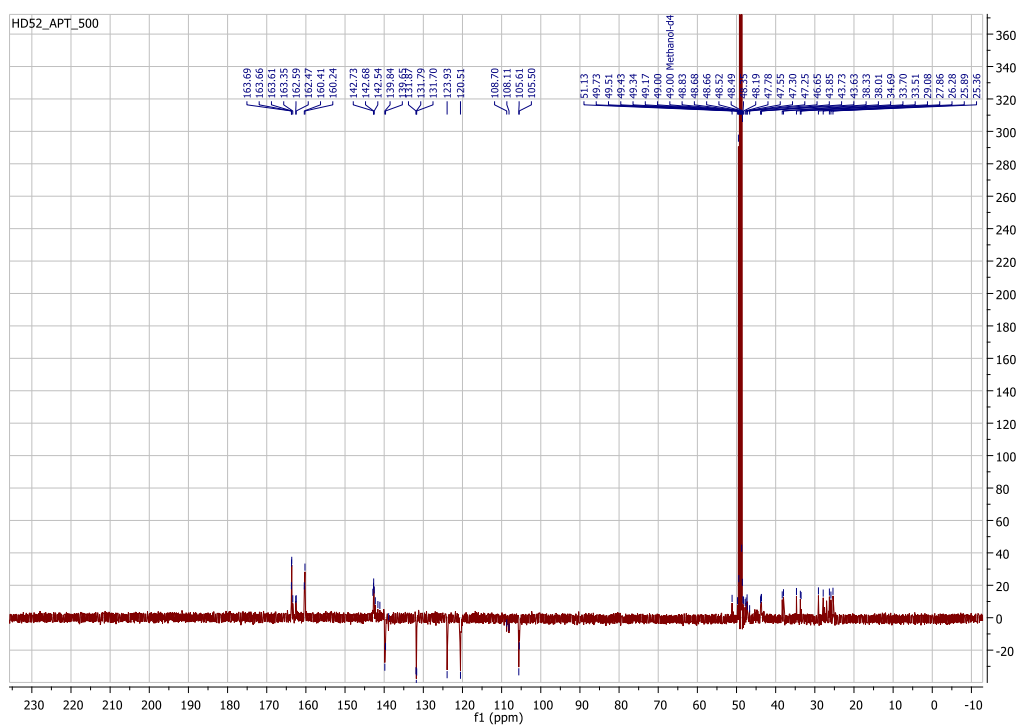

## 3,4,3-(LI-1,2-HOPOBn)-Ph tetrazine 4

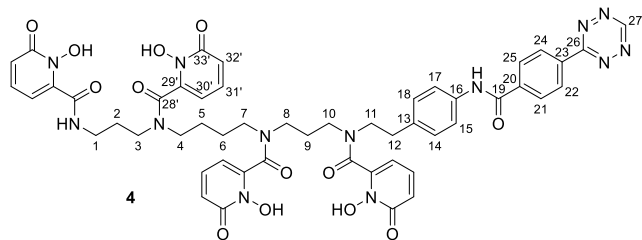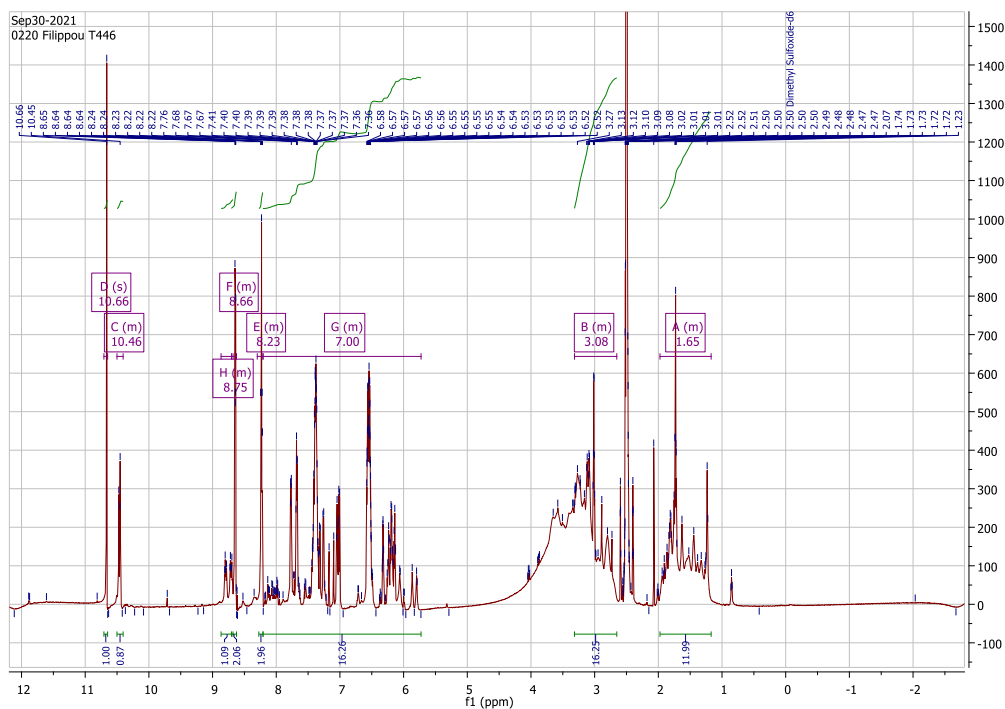

## DFT-optimized complex geometries of Zr-1 – Zr-5, reacted with model TCO and corresponding cartesian xyz-coordinates

### Zr-1 + TCO-butylcarbamate

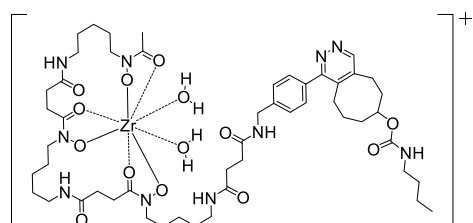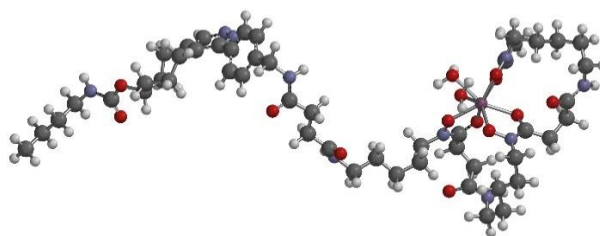

|    |                |              |               |   |              |               |               |
|----|----------------|--------------|---------------|---|--------------|---------------|---------------|
| Zr | -5.4152810000  | 2.5526600000 | -3.9809940000 | C | 0.8264610000 | 3.4483930000  | -2.7022800000 |
| C  | -1.0431930000  | 2.0075390000 | -3.6853760000 | H | 1.1099760000 | 4.5003400000  | -2.5636600000 |
| N  | -2.4129580000  | 2.0023680000 | -4.2096350000 | H | 1.5310410000 | 3.0346970000  | -3.4380630000 |
| C  | -2.8846760000  | 1.5943490000 | -5.3711440000 | C | 0.9870290000 | 2.7116030000  | -1.3646670000 |
| C  | -2.0352170000  | 1.0299570000 | -6.4796240000 | H | 0.2353920000 | 3.0730080000  | -0.6501510000 |
| C  | -1.9686910000  | 1.9589890000 | -7.7062280000 | H | 0.8156950000 | 1.6346970000  | 1.4912330000  |
| C  | -1.1922590000  | 3.2421030000 | -7.4107880000 | C | 2.3823930000 | 2.9220350000  | -0.7585250000 |
| O  | -0.2303540000  | 3.2481800000 | -6.6311490000 | H | 3.1544900000 | 2.5741080000  | -1.4531750000 |
| N  | -1.6234740000  | 4.3421850000 | -8.0686000000 | H | 2.5521170000 | 3.9870820000  | -0.5748170000 |
| C  | -1.0821410000  | 5.6839470000 | -7.8673560000 | N | 2.5742030000 | 2.2202900000  | 0.5062910000  |
| C  | -2.1918820000  | 6.7012010000 | -7.5697360000 | H | 2.8996670000 | 1.2631640000  | 0.4762980000  |
| C  | -2.9959260000  | 6.3866580000 | -6.3012050000 | C | 2.2410430000 | 2.7567820000  | 1.7043500000  |
| C  | -4.2679310000  | 7.2370850000 | -6.1895780000 | O | 1.7677670000 | 3.8947680000  | 1.8197320000  |
| C  | -5.2068430000  | 6.8297970000 | -5.0459930000 | C | 2.5251940000 | 1.8830990000  | 2.9218660000  |
| N  | -5.5662410000  | 5.4032550000 | -5.0567890000 | H | 2.7480550000 | 0.8522370000  | 2.6257100000  |
| C  | -6.3276090000  | 4.7369780000 | -5.9044930000 | H | 3.4223130000 | 2.2813850000  | 3.4111220000  |
| C  | -7.0379320000  | 5.4133060000 | -7.0477120000 | C | 1.3654020000 | 1.9205360000  | 3.9263390000  |
| C  | -8.4633410000  | 4.8905930000 | -7.2431920000 | H | 1.1045880000 | 2.9686090000  | 4.1143280000  |
| C  | -9.3641650000  | 5.2013190000 | -6.0498520000 | H | 0.4776740000 | 1.4326230000  | 3.5089230000  |
| O  | -8.9053780000  | 5.6233990000 | -4.9794420000 | C | 1.7665740000 | 1.2986360000  | 5.2583440000  |
| N  | -10.6816860000 | 4.9668760000 | -6.2529420000 | O | 2.8105390000 | 1.6286890000  | 5.8358370000  |
| C  | -11.6874120000 | 5.0078760000 | -5.1956630000 | N | 0.8997600000 | 0.3897640000  | 5.7682630000  |
| C  | -12.2495000000 | 3.6165980000 | -4.8599400000 | H | 0.1087190000 | 0.1024190000  | 5.2067850000  |
| C  | -11.2040790000 | 2.5697480000 | -4.4440380000 | C | 1.1364890000 | -0.3322140000 | 7.0189670000  |
| C  | -10.4931800000 | 2.8682380000 | -3.1166250000 | H | 0.1771260000 | -0.4388750000 | 7.5336420000  |
| C  | -9.5399210000  | 1.7530220000 | -2.6656980000 | H | 1.7843880000 | 0.3002910000  | 7.6303880000  |
| N  | -8.2889820000  | 1.6984430000 | -3.4307460000 | C | 1.7699260000 | -1.6953880000 | 6.8051740000  |

|   |                |               |               |   |               |               |              |
|---|----------------|---------------|---------------|---|---------------|---------------|--------------|
| C | -7.8946240000  | 0.8273140000  | -4.3443800000 | C | 3.1211820000  | -1.8020930000 | 6.4446950000 |
| C | -8.7715610000  | -0.2904640000 | -4.8305050000 | C | 1.0168410000  | -2.8680040000 | 6.9338060000 |
| O | -3.3426210000  | 2.4355800000  | -3.3062100000 | C | 3.7023190000  | -3.0480500000 | 6.2216070000 |
| O | -4.1612360000  | 1.6825180000  | -5.5513440000 | H | 3.7149370000  | -0.8998890000 | 6.3276150000 |
| O | -4.9572540000  | 4.6317090000  | -4.0986960000 | C | 1.5935460000  | -4.1173500000 | 6.7025600000 |
| O | -6.4170580000  | 3.4690510000  | -5.7414310000 | H | -0.0318560000 | -2.8045910000 | 7.2150210000 |
| O | -7.3597670000  | 2.6351390000  | -3.0527440000 | C | 2.9466220000  | -4.2257630000 | 6.3501780000 |
| O | -6.6977700000  | 0.9258800000  | -4.7958040000 | H | 4.7455650000  | -3.1032340000 | 5.9236710000 |
| H | -0.3810230000  | 1.6154140000  | -4.4553760000 | H | 0.9947800000  | -5.0182180000 | 6.7972170000 |
| H | -1.0266010000  | 0.8028670000  | -6.1380240000 | C | 3.5330820000  | -5.5633340000 | 6.0407350000 |
| H | -2.5073230000  | 0.0881530000  | -6.7791630000 | C | 4.7426920000  | -6.0425830000 | 6.6086110000 |
| H | -2.9753860000  | 2.1832610000  | -8.0720490000 | C | 5.2035990000  | -7.2706030000 | 6.1191860000 |
| H | -1.4456950000  | 1.4243460000  | -8.5088760000 | C | 4.3845240000  | -7.9372940000 | 5.1977360000 |
| H | -2.4223040000  | 4.2485820000  | -8.6840220000 | H | 4.6806150000  | -8.9078870000 | 4.8048890000 |
| H | -0.3731450000  | 5.6149570000  | -7.0386100000 | N | 2.8023070000  | -6.2754700000 | 5.1631220000 |
| H | -0.5225800000  | 5.9955890000  | -8.7586520000 | N | 3.2136440000  | -7.4779590000 | 4.7590880000 |
| H | -1.7342930000  | 7.6962620000  | -7.4971700000 | C | 8.0512680000  | -5.5164510000 | 7.8552410000 |
| H | -2.8742310000  | 6.7384340000  | -8.4316550000 | C | 6.5413410000  | -7.8540460000 | 6.4924160000 |
| H | -2.3664840000  | 6.5289650000  | -5.4118840000 | C | 8.6694230000  | -6.3537750000 | 6.7277370000 |
| H | -3.2771120000  | 5.3264950000  | -6.3188930000 | C | 7.6966280000  | -7.0754160000 | 5.7946390000 |
| H | -4.0135370000  | 8.2941230000  | -6.0367140000 | H | 6.6742060000  | -7.8403810000 | 7.5797210000 |
| H | -4.8156290000  | 7.1882370000  | -7.1392470000 | H | 7.7908500000  | -6.1869480000 | 8.6834280000 |
| H | -6.1294640000  | 7.4173590000  | -5.0702140000 | H | 8.8444900000  | -4.8644420000 | 8.2395790000 |
| H | -4.7374000000  | 6.9865600000  | -4.0732670000 | H | 6.5676710000  | -8.9054030000 | 6.1913910000 |
| H | -7.0488660000  | 6.4952180000  | -6.9060320000 | H | 9.3216100000  | -5.7290310000 | 6.1119260000 |
| H | -6.4610010000  | 5.2106550000  | -7.9589740000 | H | 8.2802020000  | -7.7545250000 | 5.1650390000 |
| H | -8.4498250000  | 3.8046600000  | -7.3917570000 | H | 7.2783060000  | -6.3247840000 | 5.1155490000 |
| H | -8.8882830000  | 5.3260540000  | -8.1544740000 | C | 5.4318810000  | -5.3222770000 | 7.7504520000 |
| H | -10.9636200000 | 4.5939280000  | -7.1519690000 | H | 5.5470070000  | -6.0404270000 | 8.5732670000 |
| H | -11.2102990000 | 5.4662730000  | -4.3278310000 | H | 4.7502650000  | -4.5535840000 | 8.1180410000 |
| H | -12.5068800000 | 5.6655270000  | -5.5086960000 | C | 6.8198100000  | -4.6558880000 | 7.4959480000 |
| H | -12.9930240000 | 3.7388310000  | -4.0607000000 | H | 6.8866090000  | -4.2843050000 | 6.4660430000 |
| H | -12.7935120000 | 3.2387670000  | -5.7360760000 | H | 6.8522680000  | -3.7678920000 | 8.1357370000 |
| H | -10.4641150000 | 2.4653060000  | -5.2484320000 | O | 9.5132770000  | -7.3253870000 | 7.4117160000 |
| H | -11.7093610000 | 1.5977070000  | -4.3614440000 | C | 10.6346340000 | -7.7470870000 | 6.7672940000 |
| H | -9.9335310000  | 3.8083700000  | -3.1750540000 | O | 11.0116930000 | -7.3213230000 | 5.6788960000 |
| H | -11.2404160000 | 2.9891600000  | -2.3212950000 | N | 11.2552100000 | -8.7145610000 | 7.4876900000 |



|   |                |               |               |   |               |                |              |
|---|----------------|---------------|---------------|---|---------------|----------------|--------------|
| H | -10.0201060000 | 0.7737700000  | -2.7264290000 | H | 10.9034280000 | -8.8892880000  | 8.4205810000 |
| H | -9.2318570000  | 1.9062870000  | -1.6273820000 | C | 12.5827410000 | -9.2105250000  | 7.1413580000 |
| H | -8.5315240000  | -0.4788360000 | -5.8796330000 | H | 12.6315930000 | -10.2663100000 | 7.4303980000 |
| H | -8.5450000000  | -1.2009340000 | -4.2624050000 | H | 12.6714630000 | -9.1617900000  | 6.0526460000 |
| H | -9.8362350000  | -0.0772660000 | -4.7397670000 | C | 13.7229040000 | -8.4262130000  | 7.8038120000 |
| H | -1.0363850000  | 1.3241890000  | -2.8304310000 | H | 13.6425730000 | -7.3704860000  | 7.5105610000 |
| O | -5.2598430000  | 3.3026950000  | -1.7569250000 | H | 13.5965320000 | -8.4620890000  | 8.8951240000 |
| H | -6.1837400000  | 3.3183290000  | -1.4391350000 | C | 15.1072190000 | -8.9670840000  | 7.4253790000 |
| H | -4.9536280000  | 4.2284310000  | -1.7426770000 | H | 15.2273400000 | -8.9215400000  | 6.3337590000 |
| O | -5.1805640000  | 0.6023130000  | -2.5885320000 | H | 15.1685460000 | -10.0305260000 | 7.6968260000 |
| H | -5.2963540000  | -0.2276470000 | -3.0848980000 | C | 16.2521740000 | -8.2021570000  | 8.0977740000 |
| H | -4.2508260000  | 0.6135370000  | -2.2932320000 | H | 17.2277090000 | -8.6035220000  | 7.7996320000 |
| C | -0.5992220000  | 3.4167150000  | -3.2767000000 | H | 16.2302350000 | -7.1393920000  | 7.8266890000 |
| H | -1.3024450000  | 3.8154860000  | -2.5375880000 | H | 16.1824620000 | -8.2678480000  | 9.1906640000 |
| H | -0.6491820000  | 4.0557180000  | -4.1645460000 |   |               |                |              |

## Zr-2 + TCO-butylcarbamate

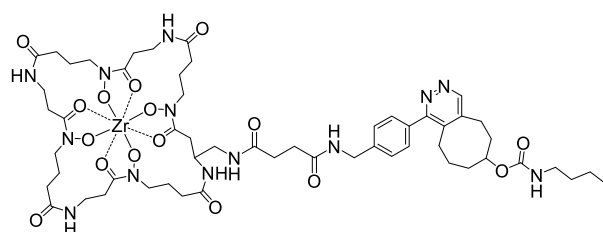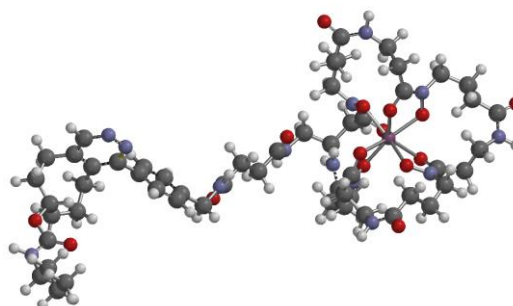

|    |               |               |               |   |               |               |               |
|----|---------------|---------------|---------------|---|---------------|---------------|---------------|
| Zr | -5.7657190000 | -2.2144160000 | 2.6742730000  | H | -8.9490500000 | -0.8336070000 | 6.3021710000  |
| O  | -5.6580600000 | -3.8122560000 | 4.2505940000  | H | -9.7455350000 | 0.6977670000  | 6.6137670000  |
| O  | -6.5587690000 | -4.1119700000 | 1.9083140000  | H | -9.3503640000 | -3.7675110000 | -0.6507110000 |
| O  | -7.5941670000 | -1.7043380000 | 3.7796840000  | H | -9.6092140000 | -6.4968170000 | 0.1310720000  |
| O  | -7.4015450000 | -1.6180040000 | 1.2563160000  | H | -8.1207020000 | -5.6050280000 | -0.1215910000 |
| O  | -4.9181310000 | -2.1740010000 | 0.5744350000  | H | -2.7289030000 | -5.6429400000 | 5.1440480000  |
| O  | -3.6470760000 | -2.8452330000 | 2.6650400000  | H | -1.3199730000 | -4.3518230000 | 3.9146530000  |
| O  | -5.0428560000 | -1.2691000000 | 4.5826900000  | H | -0.5852810000 | -5.8153540000 | 3.2853870000  |
| O  | -5.2210650000 | -0.1144010000 | 2.3359080000  | N | -6.4174760000 | -5.2199060000 | 2.6973120000  |
| C  | -8.5728150000 | -1.4291200000 | 1.7325320000  | C | -6.7115250000 | -6.4896790000 | 2.0397660000  |
| N  | -8.7218860000 | -1.4562920000 | 3.0462180000  | C | -9.2070300000 | 0.1276990000  | 5.8440820000  |
| C  | -3.6642030000 | -2.3948180000 | 0.4288790000  | C | -4.3441750000 | -6.9105260000 | 4.5869270000  |
| N  | -2.9590390000 | -2.7309620000 | 1.4923390000  | H | -4.1364100000 | -7.5622150000 | 5.4415870000  |
| C  | -4.7927740000 | -0.0162340000 | 4.5784630000  | H | -4.4622400000 | -7.5425040000 | 3.7054400000  |
| N  | -4.8577640000 | 0.6281430000  | 3.4251000000  | C | -2.2205530000 | -0.6021300000 | -2.6846120000 |
| C  | -5.9288200000 | -5.0146000000 | 3.9087510000  | H | -1.7065070000 | -1.4913850000 | -3.0609940000 |
| C  | -4.6401020000 | 2.0487650000  | 3.1621490000  | H | -3.1705970000 | -0.5108140000 | -3.2285910000 |
| C  | -4.4925380000 | 0.6826490000  | 5.8842380000  | N | -1.3577180000 | 0.5431660000  | -2.9326250000 |
| C  | -5.6523260000 | -6.1366250000 | 4.8823810000  | H | -1.4255860000 | 1.3066550000  | -2.2592100000 |
| C  | -9.9567990000 | -1.3478600000 | 3.8181420000  | C | -0.3700770000 | 0.5281630000  | -3.8558830000 |
| C  | -9.7283540000 | -1.2197790000 | 0.7818250000  | O | -0.1694200000 | -0.4251830000 | -4.6209120000 |
| C  | -1.5128140000 | -2.9274740000 | 1.5931330000  | C | 0.4968080000  | 1.7816500000  | -3.9112330000 |
| C  | -3.0542930000 | -2.2068070000 | -0.9402250000 | H | 0.3453740000  | 2.2446400000  | -4.8931180000 |
| C  | -3.5983740000 | 2.2919390000  | 2.0599450000  | H | 0.1939920000  | 2.5095370000  | -3.1509490000 |
| C  | -5.6909980000 | 1.4959260000  | 6.4252650000  | C | 1.9866700000  | 1.4335000000  | -3.7625120000 |
| O  | -2.0653130000 | 1.9890250000  | -0.5744390000 | H | 2.2272450000  | 0.6275640000  | -4.4657650000 |
| O  | -3.2009100000 | -6.2853830000 | 2.0794950000  | H | 2.1977510000  | 1.0646840000  | -2.7531800000 |
| C  | -8.1912730000 | -6.7597510000 | 1.7352270000  | C | 2.8723520000  | 2.6226700000  | -4.1124620000 |

|   |                |               |               |   |               |              |               |
|---|----------------|---------------|---------------|---|---------------|--------------|---------------|
| O | -10.0377440000 | -4.6131140000 | 2.3223440000  | O | 2.7495500000  | 3.2247510000 | -5.1852810000 |
| O | -7.8692620000  | 1.7476190000  | 4.6298910000  | N | 3.7998860000  | 2.9571800000 | -3.1789840000 |
| C | -10.1296230000 | -0.0578350000 | 4.6303960000  | H | 3.8127510000  | 2.4499850000 | -2.3032180000 |
| C | -10.5726180000 | -2.4953250000 | 0.5386500000  | C | 4.7337290000  | 4.0610980000 | -3.3410650000 |
| C | -1.0488170000  | -4.3809410000 | 1.7457720000  | H | 4.4419580000  | 4.9011140000 | -2.6977900000 |
| C | -2.5186260000  | -0.7753190000 | -1.1837890000 | H | 4.6252920000  | 4.3996050000 | -4.3767030000 |
| N | -3.4826220000  | 0.2022200000  | -0.6564170000 | C | 6.1745160000  | 3.6830310000 | -3.0521710000 |
| C | -4.1538250000  | 2.1701700000  | 0.6117390000  | C | 7.0370900000  | 4.6259500000 | -2.4792940000 |
| C | -3.1467740000  | 1.4583580000  | -0.2717170000 | C | 6.6855980000  | 2.4192560000 | -3.3733560000 |
| N | -6.9389470000  | 0.7526380000  | 6.4575750000  | C | 8.3776070000  | 4.3220020000 | -2.2458330000 |
| C | -7.9407300000  | 0.9311880000  | 5.5552300000  | H | 6.6559760000  | 5.6088400000 | -2.2113410000 |
| N | -9.7891520000  | -3.6859370000 | 0.2575420000  | C | 8.0253280000  | 2.1108200000 | -3.1382900000 |
| C | -8.8456050000  | -5.8973900000 | 0.6465120000  | H | 6.0296220000  | 1.6654200000 | -3.7994280000 |
| C | -9.5820450000  | -4.6690920000 | 1.1746510000  | C | 8.8937320000  | 3.0622040000 | -2.5814320000 |
| N | -3.1864960000  | -6.0658710000 | 4.3468530000  | H | 9.0300360000  | 5.0645370000 | -1.7954510000 |
| C | -1.3625370000  | -5.0651350000 | 3.0834860000  | H | 8.3939750000  | 1.1163040000 | -3.3759860000 |
| C | -2.6825850000  | -5.8318030000 | 3.1056390000  | C | 10.3218520000 | 2.7434470000 | -2.2730110000 |
| H | -4.3026150000  | 2.5062410000  | 4.0922670000  | C | 11.2737730000 | 2.3712540000 | -3.2600290000 |
| H | -5.6070200000  | 2.4950080000  | 2.9021930000  | C | 12.5638930000 | 2.1025200000 | -2.7939410000 |
| H | -3.6260760000  | 1.3472330000  | 5.7982980000  | C | 12.7846740000 | 2.2268760000 | -1.4137650000 |
| H | -4.2304080000  | -0.1063100000 | 6.5945190000  | H | 13.7666620000 | 2.0133790000 | -0.9957120000 |
| H | -6.3387780000  | -7.2879680000 | 2.6811900000  | N | 10.6260770000 | 2.8712860000 | -0.9704730000 |
| H | -6.1195910000  | -6.5046180000 | 1.1180230000  | N | 11.8623780000 | 2.6101280000 | -0.5350240000 |
| H | -6.4791050000  | -6.8545110000 | 4.9162970000  | C | 14.5392770000 | 2.9904930000 | -4.1318300000 |
| H | -5.5853760000  | -5.6675560000 | 5.8678280000  | C | 13.7192990000 | 4.1382100000 | -4.7286870000 |
| H | -9.9876690000  | -2.2241760000 | 4.4749830000  | H | 15.2792400000 | 2.6681250000 | -4.8751140000 |
| H | -10.7903130000 | -1.4325730000 | 3.1205940000  | H | 15.0937190000 | 3.3795670000 | -3.2696550000 |
| H | -9.2835420000  | -0.8919770000 | -0.1618570000 | C | 12.8075820000 | 3.7516680000 | -5.9096230000 |
| H | -10.3934370000 | -0.4207380000 | 1.1262930000  | H | 13.1240470000 | 4.6302080000 | -3.9553460000 |
| H | -1.1881620000  | -2.3277520000 | 2.4502580000  | C | 11.3200020000 | 3.5575980000 | -5.5629750000 |
| H | -1.0551860000  | -2.4976590000 | 0.7006070000  | H | 12.8586320000 | 4.5636430000 | -6.6432560000 |
| H | -3.8543830000  | -2.4197250000 | -1.6566930000 | H | 13.2019500000 | 2.8583620000 | -6.4122460000 |
| H | -2.2474170000  | -2.9181790000 | -1.1288340000 | H | 10.9511800000 | 4.4595230000 | -5.0570530000 |
| H | -2.7679480000  | 1.5942030000  | 2.2173370000  | H | 10.7708770000 | 3.4880060000 | -6.5095970000 |
| H | -3.1866140000  | 3.2955970000  | 2.2041410000  | C | 13.7205670000 | 1.7548870000 | -3.6994220000 |
| H | -5.4480110000  | 1.8323840000  | 7.4384830000  | H | 14.3968120000 | 1.0738480000 | -3.1713490000 |
| H | -5.8653760000  | 2.3806440000  | 5.8100940000  | H | 13.3630280000 | 1.2187050000 | -4.5833670000 |

|   |                |               |               |   |               |              |               |
|---|----------------|---------------|---------------|---|---------------|--------------|---------------|
| H | -8.7784440000  | -6.6832250000 | 2.6565250000  | O | 14.7242440000 | 5.0969370000 | -5.1670770000 |
| H | -8.2335180000  | -7.8084620000 | 1.4188000000  | C | 14.3489740000 | 6.4040250000 | -5.2044140000 |
| H | -11.1673920000 | -0.0747550000 | 4.9829610000  | O | 13.2399220000 | 6.8181240000 | -4.8789270000 |
| H | -10.0326520000 | 0.8101550000  | 3.9699550000  | N | 15.3618690000 | 7.1730490000 | -5.6717700000 |
| H | -11.1861890000 | -2.7244170000 | 1.4110850000  | H | 16.2656280000 | 6.7335960000 | -5.7841020000 |
| H | -11.2443640000 | -2.3010640000 | -0.3037060000 | C | 15.2846400000 | 8.6250100000 | -5.6724040000 |
| H | 0.0393600000   | -4.3565240000 | 1.6155480000  | H | 16.0003070000 | 9.0148770000 | -6.3994540000 |
| H | -1.4543400000  | -4.9842950000 | 0.9268050000  | H | 14.2782060000 | 8.9322610000 | -5.9637230000 |
| H | -1.5779350000  | -0.6389990000 | -0.6357430000 | C | 10.9263050000 | 2.3092280000 | -4.7338090000 |
| H | -4.3546490000  | -0.1712900000 | -0.2949010000 | H | 11.3876660000 | 1.4222990000 | -5.1837280000 |
| H | -5.1039770000  | 1.6349890000  | 0.6207030000  | H | 9.8492440000  | 2.1787160000 | -4.8393490000 |
| H | -4.3252050000  | 3.1672020000  | 0.1937820000  | H | 15.5102550000 | 9.0548170000 | -4.6872940000 |
| H | -7.0481590000  | 0.0346220000  | 7.1624210000  |   |               |              |               |

## Zr-3 + TCO-methylcarbamate

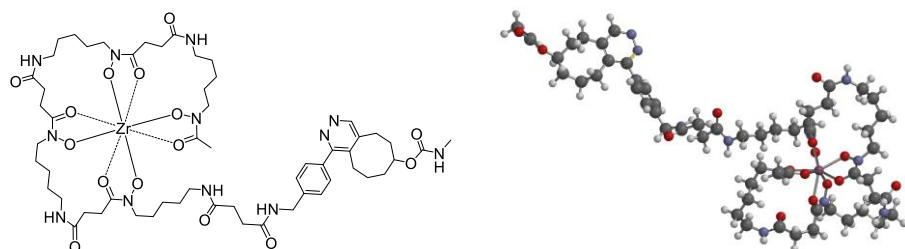

|    |                |               |               |   |               |               |               |
|----|----------------|---------------|---------------|---|---------------|---------------|---------------|
| Zr | -5.8027050000  | 1.4392630000  | -3.3911070000 | C | -3.5381360000 | 5.9734230000  | -3.0724490000 |
| C  | -8.2876350000  | 5.1595530000  | -3.5308370000 | H | -3.8113930000 | 6.1025460000  | -2.0181100000 |
| N  | -7.8577400000  | 3.7700410000  | -3.7372940000 | H | -4.4738720000 | 5.8052760000  | -3.6107160000 |
| C  | -8.1603070000  | 2.9524330000  | -4.7301150000 | C | -2.6738510000 | 4.7141730000  | -3.2356960000 |
| C  | -9.2429960000  | 3.2472740000  | -5.7402980000 | H | -1.7974580000 | 4.7420820000  | -2.5853630000 |
| C  | -10.4879740000 | 2.3584120000  | -5.5491220000 | H | -2.3206500000 | 4.6265730000  | -4.2659260000 |
| C  | -11.1739630000 | 2.6218290000  | -4.2092560000 | C | -3.5788320000 | 3.5276390000  | -2.9642860000 |
| O  | -11.2891980000 | 3.7675620000  | -3.7533980000 | O | -4.2376210000 | 3.0144350000  | -3.9314820000 |
| N  | -11.6362940000 | 1.5235620000  | -3.5700830000 | N | -3.8214890000 | 3.0932060000  | -1.7370350000 |
| C  | -12.2284830000 | 1.5371600000  | -2.2344490000 | C | -3.2274450000 | 3.5330030000  | -0.4749860000 |
| C  | -11.7177510000 | 0.3578370000  | -1.3969470000 | H | -4.0372550000 | 3.9511570000  | 0.1340280000  |
| C  | -10.2021200000 | 0.3880540000  | -1.1564470000 | H | -2.5194640000 | 4.3342590000  | -0.6912810000 |
| C  | -9.6598880000  | -0.9423600000 | -0.6218980000 | O | -4.8105230000 | 2.1599020000  | -1.5831650000 |
| C  | -8.1289640000  | -0.9982700000 | -0.5120320000 | C | -2.5310630000 | 2.3973990000  | 0.2840560000  |
| N  | -7.4275070000  | -0.5913980000 | -1.7365650000 | H | -3.2728110000 | 1.6352810000  | 0.5486680000  |
| C  | -7.3023340000  | -1.2370110000 | -2.8858840000 | H | -2.1640120000 | 2.8228810000  | 1.2275130000  |
| C  | -7.9051730000  | -2.6085170000 | -3.0810050000 | C | -1.3707420000 | 1.7518030000  | -0.4817410000 |
| C  | -7.0216210000  | -3.5291210000 | -3.9244480000 | H | -1.7522960000 | 1.3066970000  | -1.4100940000 |
| C  | -5.6852450000  | -3.8364410000 | -3.2517820000 | H | -0.6479060000 | 2.5249300000  | -0.7804490000 |
| O  | -5.3396240000  | -3.2879290000 | -2.1967560000 | C | -0.6521060000 | 0.6706530000  | 0.3343860000  |
| N  | -4.9169530000  | -4.7425130000 | -3.9027940000 | H | -0.1898060000 | 1.1158130000  | 1.2257370000  |
| C  | -3.5396950000  | -5.0552150000 | -3.5358540000 | H | -1.3824720000 | -0.0689660000 | 0.6920570000  |
| C  | -2.5337730000  | -4.6350260000 | -4.6187680000 | C | 0.4301180000  | -0.0478400000 | -0.4820750000 |
| C  | -2.5600040000  | -3.1452780000 | -4.9923860000 | H | 1.1813710000  | 0.6658010000  | -0.8306470000 |
| C  | -2.1169540000  | -2.1972160000 | -3.8700480000 | H | -0.0185150000 | -0.5205100000 | -1.3642810000 |
| C  | -2.0477620000  | -0.7272010000 | -4.3049340000 | N | 1.1340900000  | -1.0742570000 | 0.2774800000  |
| N  | -3.3636200000  | -0.1019900000 | -4.4584950000 | H | 0.6488750000  | -1.9439420000 | 0.4563680000  |
| C  | -3.9686770000  | 0.3018330000  | -5.5633540000 | C | 2.3568680000  | -0.8891910000 | 0.8322460000  |
| C  | -3.3848570000  | 0.0785260000  | -6.9324750000 | O | 2.9941460000  | 0.1657750000  | 0.7186010000  |

|   |                |               |               |   |               |               |              |
|---|----------------|---------------|---------------|---|---------------|---------------|--------------|
| O | -6.8395990000  | 3.3622670000  | -2.9223380000 | C | 2.9251530000  | -2.0937740000 | 1.5764590000 |
| O | -7.5055630000  | 1.8515680000  | -4.8079510000 | H | 2.1319340000  | -2.8033560000 | 1.8355310000 |
| O | -6.8849380000  | 0.6684250000  | -1.7040170000 | H | 3.6069730000  | -2.6147950000 | 0.8932050000 |
| O | -6.6901660000  | -0.6469140000 | -3.8336890000 | C | 3.7088700000  | -1.6732580000 | 2.8212990000 |
| O | -3.9811830000  | 0.1970700000  | -3.2727370000 | H | 4.3888100000  | -0.8569800000 | 2.5457390000 |
| O | -5.0788710000  | 0.9282620000  | -5.4542770000 | H | 3.0367580000  | -1.2780500000 | 3.5912980000 |
| H | -9.2792160000  | 5.2861480000  | -3.9653540000 | C | 4.5591050000  | -2.8086740000 | 3.3802870000 |
| H | -8.3781020000  | 5.2909280000  | -2.4482230000 | O | 5.0842890000  | -3.6579150000 | 2.6495680000 |
| H | -9.5378680000  | 4.2960550000  | -5.7162300000 | N | 4.7118840000  | -2.8041330000 | 4.7284630000 |
| H | -8.8193070000  | 3.0449410000  | -6.7295250000 | H | 4.3076920000  | -2.0431870000 | 5.2595590000 |
| H | -10.2201900000 | 1.3025160000  | -5.6543130000 | C | 5.5822400000  | -3.7373310000 | 5.4415750000 |
| H | -11.2018410000 | 2.5939350000  | -6.3480570000 | H | 5.6865430000  | -4.6166250000 | 4.8006260000 |
| H | -11.5125000000 | 0.6225490000  | -4.0148970000 | H | 5.0737290000  | -4.0451600000 | 6.3602520000 |
| H | -11.9623310000 | 2.4945020000  | -1.7783070000 | C | 6.9443020000  | -3.1537780000 | 5.7741680000 |
| H | -13.3235110000 | 1.4982620000  | -2.3064130000 | C | 7.8579450000  | -2.8504350000 | 4.7540210000 |
| H | -12.2594170000 | 0.3535340000  | -0.4425660000 | C | 7.3088320000  | -2.8902580000 | 7.0987780000 |
| H | -11.9884200000 | -0.5773310000 | -1.9088550000 | C | 9.1041330000  | -2.3046170000 | 5.0529940000 |
| H | -9.9498560000  | 1.2054600000  | -0.4665820000 | H | 7.5865640000  | -3.0403770000 | 3.7191370000 |
| H | -9.6997300000  | 0.6136790000  | -2.1041800000 | C | 8.5551020000  | -2.3389240000 | 7.4018450000 |
| H | -10.0672710000 | -1.1539560000 | 0.3756100000  | H | 6.6124870000  | -3.1175780000 | 7.9028220000 |
| H | -10.0042610000 | -1.7556920000 | -1.2737860000 | C | 9.4731610000  | -2.0481780000 | 6.3842770000 |
| H | -7.7975900000  | -2.0039740000 | -0.2339750000 | H | 9.7903220000  | -2.0627340000 | 4.2456570000 |
| H | -7.7657680000  | -0.3081770000 | 0.2519340000  | H | 8.8205620000  | -2.1342590000 | 8.4349790000 |
| H | -8.1205760000  | -3.0733680000 | -2.1172050000 | C | 10.7800740000 | -1.4058210000 | 6.7255620000 |
| H | -8.8655530000  | -2.4772060000 | -3.5962220000 | C | 12.0457390000 | -1.9639430000 | 6.3993370000 |
| H | -6.8241190000  | -3.0744280000 | -4.9018180000 | C | 13.1593560000 | -1.1946470000 | 6.7562000000 |
| H | -7.5560920000  | -4.4663060000 | -4.1191250000 | C | 12.9124590000 | 0.0234580000  | 7.4067730000 |
| H | -5.2672970000  | -5.1264580000 | -4.7725060000 | H | 13.7430020000 | 0.6643740000  | 7.6963200000 |
| H | -3.3483260000  | -4.5446620000 | -2.5904950000 | N | 10.6345370000 | -0.2430280000 | 7.3853480000 |
| H | -3.4496580000  | -6.1332630000 | -3.3544520000 | N | 11.7040320000 | 0.4768270000  | 7.7302590000 |
| H | -1.5299230000  | -4.9145910000 | -4.2703130000 | C | 12.1723820000 | -3.3093680000 | 5.7120110000 |
| H | -2.7245460000  | -5.2298110000 | -5.5225710000 | C | 15.0284690000 | -2.6311120000 | 7.6770190000 |
| H | -3.5702970000  | -2.8744700000 | -5.3269630000 | C | 12.8691720000 | -4.4640440000 | 6.4972800000 |
| H | -1.8991320000  | -2.9978650000 | -5.8578320000 | C | 15.3570580000 | -4.0487680000 | 7.2006770000 |
| H | -2.7874830000  | -2.2717450000 | -3.0066320000 | C | 14.3718390000 | -4.6676450000 | 6.2002040000 |
| H | -1.1148960000  | -2.4835560000 | -3.5232660000 | H | 12.6987670000 | -3.1697540000 | 4.7582920000 |
| H | -1.4981700000  | -0.6223800000 | -5.2432540000 | H | 12.6878380000 | -4.3591740000 | 7.5737340000 |

|   |               |               |               |   |               |               |               |
|---|---------------|---------------|---------------|---|---------------|---------------|---------------|
| H | -1.5267940000 | -0.1314960000 | -3.5483900000 | H | 14.2377110000 | -2.7140850000 | 8.4302120000  |
| H | -4.2111240000 | -0.0380020000 | -7.6381530000 | H | 15.4172190000 | -4.7085540000 | 8.0742160000  |
| H | -2.8051160000 | 0.9593690000  | -7.2349260000 | H | 11.1715150000 | -3.6529270000 | 5.4531600000  |
| H | -2.7418390000 | -0.7996930000 | -6.9937430000 | H | 15.9002690000 | -2.2323360000 | 8.2047030000  |
| C | -7.2417890000 | 6.1130020000  | -4.1157680000 | H | 12.3553900000 | -5.3835860000 | 6.1990550000  |
| H | -6.2856150000 | 5.8108780000  | -3.6852000000 | H | 14.5934080000 | -5.7397990000 | 6.1572870000  |
| H | -7.1679890000 | 5.9380270000  | -5.1976420000 | H | 14.6011970000 | -4.2744330000 | 5.2030830000  |
| C | -7.4609060000 | 7.6114340000  | -3.8653780000 | C | 14.5883000000 | -1.6369640000 | 6.5614210000  |
| H | -7.7276350000 | 7.7891640000  | -2.8137980000 | H | 14.7234980000 | -2.0835220000 | 5.5711220000  |
| H | -8.3095420000 | 7.9651150000  | -4.4638380000 | H | 15.2319820000 | -0.7527170000 | 6.5897190000  |
| C | -6.1922290000 | 8.4181600000  | -4.2264600000 | O | 16.6353260000 | -4.0735350000 | 6.4990600000  |
| H | -6.4570620000 | 9.4525660000  | -4.4737530000 | C | 17.8464440000 | -4.0289840000 | 7.1177470000  |
| H | -5.7416250000 | 7.9877770000  | -5.1300320000 | O | 18.8500840000 | -3.9379090000 | 6.4179600000  |
| C | -5.1377960000 | 8.4194610000  | -3.0872350000 | N | 17.8850120000 | -4.0775520000 | 8.4720310000  |
| H | -5.2542850000 | 9.3226560000  | -2.4791850000 | H | 17.0546730000 | -4.2891170000 | 9.0045550000  |
| H | -5.3132400000 | 7.5788280000  | -2.4144120000 | C | 19.1631710000 | -4.1320230000 | 9.1704720000  |
| N | -3.7428290000 | 8.3623160000  | -3.5311040000 | H | 18.9665620000 | -4.0880930000 | 10.2431280000 |
| H | -3.3361010000 | 9.2102420000  | -3.9111780000 | H | 19.7863880000 | -3.2791410000 | 8.8878200000  |
| C | -2.9314920000 | 7.2697070000  | -3.5902260000 | H | 19.7119880000 | -5.0538940000 | 8.9443090000  |
| O | -1.7796100000 | 7.3348750000  | -4.0333420000 |   |               |               |               |

## Zr-4 + TCO-butylcarbamate

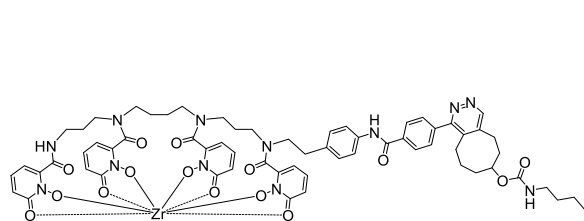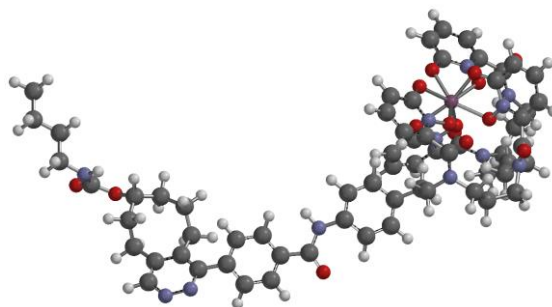

|   |               |               |               |    |               |               |               |
|---|---------------|---------------|---------------|----|---------------|---------------|---------------|
| C | -1.8255460000 | -0.1863970000 | -2.3779470000 | H  | -6.5525150000 | 3.0450480000  | -0.3698830000 |
| C | -1.6976300000 | -0.2465180000 | -1.0018340000 | C  | -7.2242010000 | 2.3494990000  | -3.5028090000 |
| C | -2.7891900000 | 0.1035390000  | -0.1812220000 | H  | -7.0198940000 | 2.0548080000  | -4.5392360000 |
| H | -0.9872230000 | -0.4614160000 | -3.0104030000 | H  | -7.3492940000 | 3.4350330000  | -3.4905500000 |
| H | -0.7813240000 | -0.5650480000 | -0.5197610000 | C  | -8.5426540000 | 1.6835590000  | -3.0726100000 |
| O | -4.9493800000 | 0.8683130000  | 0.0147690000  | H  | -8.4928810000 | 0.6072970000  | -3.2567500000 |
| O | -2.8438410000 | 0.0575880000  | 1.0995030000  | H  | -9.3037120000 | 2.0857420000  | -3.7539140000 |
| C | -5.4716810000 | 0.8353220000  | -2.7710490000 | Zr | -4.7722760000 | 0.4692370000  | 2.1886830000  |
| O | -5.9976330000 | -0.1081530000 | -3.3728100000 | C  | -3.0394290000 | 0.2050590000  | -2.9646600000 |
| N | -6.0113500000 | 2.0716640000  | -2.7048630000 | H  | -3.1697350000 | 0.2174960000  | -4.0401210000 |
| C | -5.3108000000 | 3.2203690000  | -2.1134410000 | N  | -3.9380020000 | 0.5349190000  | -0.8088460000 |
| H | -4.3301870000 | 2.8827130000  | -1.7756740000 | C  | -4.1023350000 | 0.5739090000  | -2.1594820000 |
| H | -5.1354550000 | 3.9621110000  | -2.9022420000 | C  | -0.2130590000 | 3.8287000000  | 2.6392910000  |
| C | -1.4590590000 | 2.0451070000  | 4.5563120000  | H  | 0.3869130000  | 4.7148600000  | 2.4081060000  |
| C | -0.4456810000 | 1.4605930000  | 5.2917650000  | H  | 0.4188990000  | 3.1678310000  | 3.2368050000  |
| C | -0.4247140000 | 0.0611350000  | 5.4291150000  | C  | -0.5943640000 | 3.0997520000  | 1.3296870000  |
| C | -1.4207750000 | -0.7233940000 | 4.8719830000  | H  | -1.0547090000 | 3.8048840000  | 0.6305410000  |
| C | -2.4641820000 | -0.1198840000 | 4.1366590000  | H  | -1.3377530000 | 2.3276020000  | 1.5516310000  |
| N | -2.3992400000 | 1.2466120000  | 3.9854290000  | C  | 0.6332480000  | 2.4803800000  | 0.6976560000  |
| H | 0.3747140000  | -0.4085680000 | 5.9940690000  | C  | 1.4300170000  | 3.1997090000  | -0.2007830000 |
| H | 0.3066030000  | 2.0874690000  | 5.7561420000  | C  | 1.0423190000  | 1.1811140000  | 1.0351900000  |
| H | -1.4365550000 | -1.8013530000 | 4.9866880000  | C  | 2.5937110000  | 2.6627340000  | -0.7538690000 |
| O | -3.3996720000 | 1.8059160000  | 3.2788010000  | H  | 1.1354310000  | 4.2076880000  | -0.4850440000 |
| O | -3.4742430000 | -0.6993080000 | 3.5985550000  | C  | 2.1972450000  | 0.6263180000  | 0.4928290000  |
| C | -1.8007910000 | 3.5257740000  | 4.5088250000  | H  | 0.4484670000  | 0.5932710000  | 1.7318050000  |
| O | -2.5416970000 | 3.9298480000  | 5.4084040000  | C  | 2.9898430000  | 1.3621650000  | -0.4049380000 |
| N | -1.3325800000 | 4.2790260000  | 3.4842080000  | H  | 3.1894870000  | 3.2397420000  | -1.4460880000 |
| C | -1.8459690000 | 5.6527560000  | 3.3318550000  | H  | 2.4941350000  | -0.3835420000 | 0.7672470000  |



|   |                |               |               |   |               |               |               |
|---|----------------|---------------|---------------|---|---------------|---------------|---------------|
| H | -2.5186650000  | 5.8226000000  | 4.1701200000  | N | 4.1449830000  | 0.7253670000  | -0.9093040000 |
| H | -1.0002210000  | 6.3424890000  | 3.4316420000  | H | 4.2092550000  | -0.2582450000 | -0.6818220000 |
| C | -6.3141860000  | 4.1065520000  | 3.9953330000  | C | 5.1838040000  | 1.2660240000  | -1.6184910000 |
| C | -7.1327400000  | 4.3240770000  | 5.0942170000  | O | 5.2011230000  | 2.4377300000  | -2.0083120000 |
| C | -7.7202730000  | 3.2502450000  | 5.7734960000  | C | 6.3343720000  | 0.3415300000  | -1.9129840000 |
| C | -7.3910440000  | 1.9547400000  | 5.4211700000  | C | 6.5639100000  | -0.8749900000 | -1.2522590000 |
| C | -6.5348030000  | 1.7210300000  | 4.3270200000  | C | 7.2532010000  | 0.7607780000  | -2.8869890000 |
| N | -6.1566010000  | 2.8138640000  | 3.5583890000  | C | 7.6713190000  | -1.6574000000 | -1.5738800000 |
| H | -8.3813910000  | 3.4362180000  | 6.6141280000  | H | 5.9108240000  | -1.2213090000 | -0.4565810000 |
| H | -7.2422730000  | 5.3399900000  | 5.4513160000  | C | 8.3640710000  | -0.0148190000 | -3.2001710000 |
| H | -7.7507070000  | 1.0920200000  | 5.9705380000  | H | 7.0851190000  | 1.7067220000  | -3.3904790000 |
| O | -5.5898630000  | 2.5138230000  | 2.3695620000  | C | 8.5848150000  | -1.2407380000 | -2.5536930000 |
| O | -6.0820650000  | 0.5773150000  | 3.9652730000  | H | 7.8386870000  | -2.5851760000 | -1.0344470000 |
| C | -5.3807950000  | 5.2524970000  | 3.6043240000  | H | 9.0682430000  | 0.3260040000  | -3.9529230000 |
| O | -4.9021980000  | 5.8633460000  | 4.5684820000  | C | 9.8171180000  | -2.0302970000 | -2.8495520000 |
| N | -5.0627100000  | 5.5472870000  | 2.3248720000  | C | 9.8012630000  | -3.4009100000 | -3.2144540000 |
| C | -3.9885100000  | 6.5357250000  | 2.0923340000  | C | 11.0548890000 | -4.0082510000 | -3.3514210000 |
| H | -4.2279390000  | 7.0406070000  | 1.1533220000  | C | 12.1808770000 | -3.1875810000 | -3.1976890000 |
| H | -4.0247850000  | 7.2830780000  | 2.8892830000  | H | 13.1795160000 | -3.6026560000 | -3.3181930000 |
| C | -8.3410300000  | -1.3158770000 | 0.2397680000  | C | 11.2340230000 | -5.4832910000 | -3.6025740000 |
| C | -8.6778270000  | -2.6378940000 | -0.0054080000 | C | 10.9374830000 | -6.3083670000 | -2.3147520000 |
| C | -7.8648570000  | -3.6740950000 | 0.4693210000  | C | 8.5120020000  | -4.1284270000 | -3.5379700000 |
| C | -6.6974220000  | -3.3758530000 | 1.1497690000  | C | 9.7459550000  | -7.2657680000 | -2.4060050000 |
| C | -6.3544870000  | -2.0343670000 | 1.3972760000  | C | 8.0403430000  | -5.2775000000 | -2.5961710000 |
| N | -7.2325080000  | -1.0511270000 | 0.9957930000  | C | 8.4585190000  | -6.7017590000 | -3.0229990000 |
| H | -8.1336860000  | -4.7076350000 | 0.2755690000  | H | 10.5858990000 | -5.8108570000 | -4.4227460000 |
| H | -9.5606090000  | -2.8280860000 | -0.6015950000 | H | 10.7479310000 | -5.6313210000 | -1.4746010000 |
| H | -6.0158540000  | -4.1430260000 | 1.4996340000  | H | 8.6079760000  | -4.5377850000 | -4.5523920000 |
| O | -6.9372390000  | 0.1906480000  | 1.4080040000  | H | 6.9456590000  | -5.2498450000 | -2.6061510000 |
| O | -5.2781350000  | -1.6346870000 | 1.9851670000  | H | 12.2616400000 | -5.6652950000 | -3.9295280000 |
| C | -9.1223810000  | -0.2373440000 | -0.4782280000 | H | 11.8228120000 | -6.8872710000 | -2.0332750000 |
| O | -10.2305610000 | -0.5213200000 | -0.9484520000 | H | 7.7137570000  | -3.3859180000 | -3.5937410000 |
| N | -8.5039810000  | 0.9454850000  | -0.6729500000 | H | 9.5096080000  | -7.6254390000 | -1.3977110000 |
| H | -7.6031980000  | 1.0859940000  | -0.2227990000 | H | 8.3326690000  | -5.0732210000 | -1.5593930000 |
| C | -9.0250900000  | 1.9208960000  | -1.6273500000 | H | 7.6548550000  | -7.4033070000 | -2.7725350000 |
| H | -8.7557080000  | 2.9204740000  | -1.2759360000 | H | 8.5569130000  | -6.7378180000 | -4.1144590000 |
| H | -10.1136180000 | 1.8419270000  | -1.5980730000 | O | 10.0681730000 | -8.4062200000 | -3.2558600000 |

|   |               |              |               |   |               |                |               |
|---|---------------|--------------|---------------|---|---------------|----------------|---------------|
| C | -2.5794030000 | 5.9103640000 | 1.9831950000  | C | 10.8337380000 | -9.4616650000  | -2.8669790000 |
| H | -2.6652730000 | 4.9744630000 | 1.4280670000  | O | 11.1244960000 | -10.3047020000 | -3.7093490000 |
| H | -1.9686710000 | 6.5810080000 | 1.3678400000  | N | 11.2464280000 | -9.5236180000  | -1.5767270000 |
| C | -5.9114610000 | 5.1946140000 | 1.1823240000  | H | 10.8616780000 | -8.8983070000  | -0.8848030000 |
| H | -6.6662070000 | 4.4887920000 | 1.5310970000  | C | 11.9660800000 | -10.6947130000 | -1.0910990000 |
| H | -6.4384290000 | 6.1018110000 | 0.8544870000  | H | 12.3072990000 | -10.4880640000 | -0.0752760000 |
| C | -5.1339040000 | 4.5859870000 | 0.0128950000  | H | 12.8334660000 | -10.8926120000 | -1.7258580000 |
| H | -4.4066790000 | 3.8714960000 | 0.4092740000  | N | 10.9469010000 | -1.3101140000  | -2.7331120000 |
| H | -4.5758360000 | 5.3634200000 | -0.5251190000 | N | 12.1343490000 | -1.8835800000  | -2.9287560000 |
| C | -6.0711880000 | 3.8449690000 | -0.9378340000 | H | 11.3311550000 | -11.5890610000 | -1.0806440000 |
| H | -6.8600040000 | 4.5148880000 | -1.3031730000 |   |               |                |               |

## Zr-5 + TCO-butylcarbamate

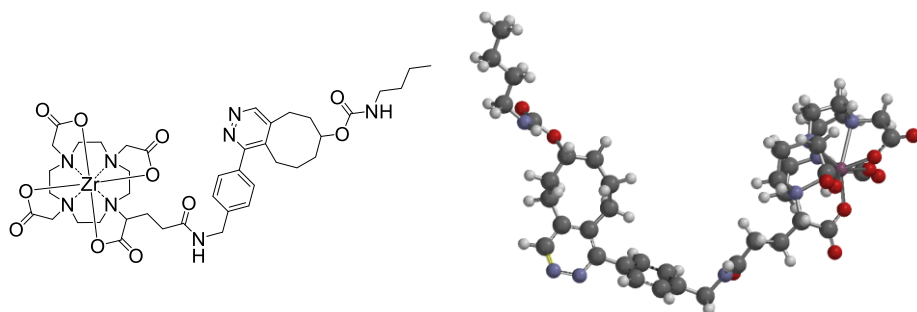

|    |               |               |              |   |              |               |               |
|----|---------------|---------------|--------------|---|--------------|---------------|---------------|
| Zr | -4.6427840000 | 0.6087830000  | 5.3787560000 | O | 2.4088720000 | -1.9242700000 | 4.4574390000  |
| O  | -4.9952930000 | 1.7796360000  | 7.1661000000 | C | 3.2039730000 | -4.2454710000 | 3.0319830000  |
| O  | -4.2408870000 | 3.2422750000  | 8.6920570000 | H | 3.1474160000 | -5.3353780000 | 3.1091620000  |
| O  | -8.7076760000 | 0.4541270000  | 6.5263390000 | H | 3.7667440000 | -3.8701670000 | 3.8900370000  |
| O  | -6.6469000000 | 0.0235770000  | 5.7507520000 | N | 1.8488160000 | -3.7088370000 | 3.1548090000  |
| O  | -4.7367610000 | -1.4428890000 | 4.7114690000 | H | 1.1191730000 | -4.1493570000 | 2.6091290000  |
| O  | -5.4548190000 | -2.9806600000 | 3.2426150000 | C | 3.8863080000 | -3.8490500000 | 1.7349800000  |
| N  | -2.3407900000 | 0.0496580000  | 4.3947890000 | C | 4.0757470000 | -4.7786650000 | 0.7067350000  |
| N  | -3.3481780000 | 2.7124810000  | 5.2000780000 | C | 4.3271050000 | -2.5320510000 | 1.5384620000  |
| N  | -6.2631110000 | 2.4411810000  | 4.7546360000 | H | 3.7449790000 | -5.8056890000 | 0.8434060000  |
| N  | -4.8929390000 | 0.5973110000  | 2.9153370000 | C | 4.9291390000 | -2.1539200000 | 0.3406220000  |
| C  | -1.4229070000 | 1.1968010000  | 4.6714510000 | H | 4.1998370000 | -1.8031370000 | 2.3342400000  |
| C  | -2.0561020000 | 2.5613330000  | 4.4548510000 | C | 5.1082250000 | -3.0845360000 | -0.6967480000 |
| C  | -4.1511250000 | 3.8084900000  | 4.5579490000 | H | 5.2812020000 | -1.1332830000 | 0.2172000000  |
| C  | -5.6291380000 | 3.7832120000  | 4.9294550000 | C | 5.8104710000 | -2.7146580000 | -1.9634490000 |
| C  | -6.7676700000 | 2.1877160000  | 3.3692080000 | C | 5.4008040000 | -1.6526960000 | -2.8152550000 |
| C  | -5.6851260000 | 1.7617020000  | 2.3945880000 | C | 6.2320030000 | -1.3998820000 | -3.9131820000 |
| C  | -3.5574820000 | 0.5798930000  | 2.2331310000 | C | 7.3447470000 | -2.2379300000 | -4.0790100000 |
| C  | -2.4966190000 | -0.2566040000 | 2.9394830000 | H | 8.0239770000 | -2.0820910000 | -4.9147820000 |
| C  | -3.0485150000 | 3.0614070000  | 6.6266560000 | N | 6.8784180000 | -3.4922640000 | -2.2166930000 |
| C  | -4.1761130000 | 2.7009050000  | 7.5933880000 | N | 7.6456940000 | -3.2613480000 | -3.2836540000 |
| C  | -7.4190020000 | 2.2912050000  | 5.6785470000 | C | 4.1400850000 | -0.8524030000 | -2.5438540000 |
| C  | -7.6586170000 | 0.8225840000  | 6.0179100000 | C | 4.9098140000 | -0.8146450000 | -5.9961650000 |
| C  | -5.6340910000 | -0.6728580000 | 2.6333920000 | C | 3.0019620000 | -0.8942230000 | -3.6109810000 |
| C  | -5.2472800000 | -1.8174820000 | 3.5693600000 | C | 3.6093480000 | -0.0100200000 | -6.0056470000 |
| C  | -1.8690250000 | -1.1635540000 | 5.1543250000 | C | 2.9836460000 | 0.2665970000  | -4.6315910000 |
| H  | -0.5220720000 | 1.1336270000  | 4.0490410000 | H | 4.4175120000 | 0.1958860000  | -2.3685250000 |
| H  | -1.0973350000 | 1.1087020000  | 5.7106880000 | H | 2.9886840000 | -1.8677070000 | -4.1154280000 |

|   |               |               |              |   |              |               |                |
|---|---------------|---------------|--------------|---|--------------|---------------|----------------|
| H | -1.3489740000 | 3.3367360000  | 4.7761720000 | H | 4.6484510000 | -1.8623000000 | -5.8145740000  |
| H | -2.2472020000 | 2.7382860000  | 3.3982310000 | H | 2.8708890000 | -0.5370210000 | -6.6212680000  |
| H | -4.0271380000 | 3.7261600000  | 3.4793750000 | H | 3.7124670000 | -1.2067510000 | -1.6063780000  |
| H | -3.7342550000 | 4.7822130000  | 4.8452550000 | H | 5.3436820000 | -0.7858960000 | -7.0006990000  |
| H | -5.7538590000 | 4.0745060000  | 5.9728870000 | H | 2.0633160000 | -0.8412430000 | -3.0499780000  |
| H | -6.1521550000 | 4.5358280000  | 4.3257280000 | H | 1.9479190000 | 0.5773770000  | -4.8086920000  |
| H | -7.2722780000 | 3.0822950000  | 2.9820260000 | H | 3.4856960000 | 1.1389790000  | -4.1971450000  |
| H | -7.5246910000 | 1.4028600000  | 3.4405900000 | C | 5.9606250000 | -0.3398780000 | -4.9502690000  |
| H | -6.1454650000 | 1.4999570000  | 1.4339080000 | H | 5.6302320000 | 0.5874570000  | -4.4715850000  |
| H | -4.9974380000 | 2.5818220000  | 2.1963690000 | H | 6.8997630000 | -0.1038280000 | -5.4596090000  |
| H | -5.4930880000 | -0.9705640000 | 1.5887930000 | C | 4.6851080000 | -4.4049270000 | -0.4921550000  |
| H | -6.7034070000 | -0.4966990000 | 2.7845600000 | H | 4.8305510000 | -5.1397390000 | -1.2785740000  |
| H | -3.2225180000 | 1.6112230000  | 2.1400830000 | O | 3.8341470000 | 1.3194320000  | -6.5624810000  |
| H | -3.6752520000 | 0.1977450000  | 1.2108000000 | C | 3.9897290000 | 1.5821480000  | -7.8885850000  |
| H | -2.4509650000 | -2.0031730000 | 4.7626370000 | O | 4.3278160000 | 2.7168320000  | -8.2115600000  |
| H | -2.7339790000 | -1.3172400000 | 2.8474820000 | N | 3.7801440000 | 0.5742190000  | -8.7740590000  |
| H | -1.5541170000 | -0.0948130000 | 2.4029930000 | H | 3.3335740000 | -0.2778910000 | -8.4661590000  |
| H | -2.8012690000 | 4.1248900000  | 6.7125390000 | C | 3.7820090000 | 0.8308180000  | -10.2153220000 |
| H | -2.1709680000 | 2.4936940000  | 6.9482250000 | H | 3.9825580000 | -0.1243110000 | -10.7115100000 |
| H | -8.3283000000 | 2.7384860000  | 5.2615620000 | H | 4.6198490000 | 1.4998070000  | -10.4305270000 |
| H | -7.1986320000 | 2.7949010000  | 6.6210200000 | C | 2.4719540000 | 1.4360010000  | -10.7353360000 |
| C | -2.3385680000 | -1.0435750000 | 6.6193780000 | H | 2.2882280000 | 2.3827910000  | -10.2108910000 |
| O | -3.3452900000 | -0.2211570000 | 6.8220100000 | H | 1.6399370000 | 0.7640070000  | -10.4823520000 |
| O | -1.8316530000 | -1.7102920000 | 7.5110950000 | C | 2.5003390000 | 1.6781720000  | -12.2494830000 |
| C | -0.3765180000 | -1.5378830000 | 5.0806640000 | H | 3.3500370000 | 2.3303370000  | -12.4966720000 |
| H | -0.2401610000 | -2.3005780000 | 5.8530340000 | H | 2.6838080000 | 0.7254160000  | -12.7661240000 |
| H | 0.2600490000  | -0.6983180000 | 5.3716970000 | C | 1.2049010000 | 2.3066290000  | -12.7743270000 |
| C | 0.1072330000  | -2.1064540000 | 3.7392480000 | H | 0.3414330000 | 1.6620220000  | -12.5680170000 |
| H | -0.5409530000 | -2.9272390000 | 3.4105930000 | H | 1.0177650000 | 3.2759610000  | -12.2960450000 |
| H | 0.0782920000  | -1.3430270000 | 2.9525010000 | H | 1.2505460000 | 2.4698760000  | -13.8572980000 |
| C | 1.5597070000  | -2.5664500000 | 3.8266260000 |   |              |               |                |

### Results of radio-iTLC analyses of [ $^{89}\text{Zr}$ ]Zr-31 and [ $^{89}\text{Zr}$ ]Zr-32

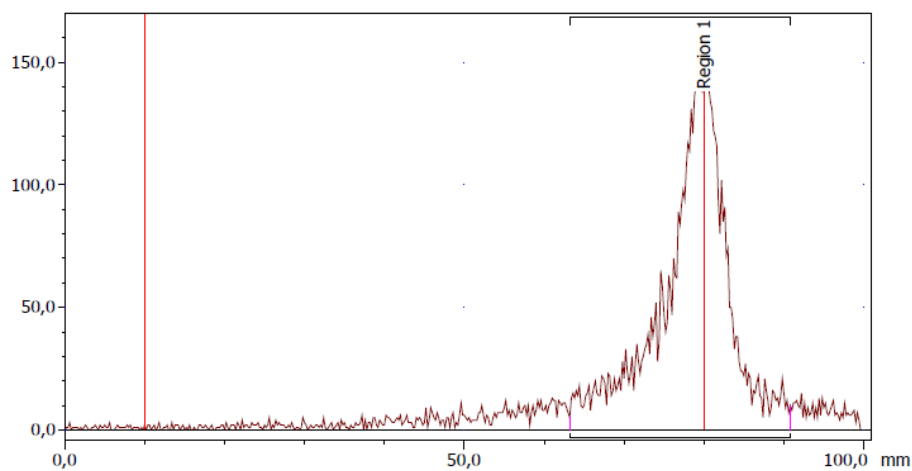

$^{89}\text{ZrCl}_4$

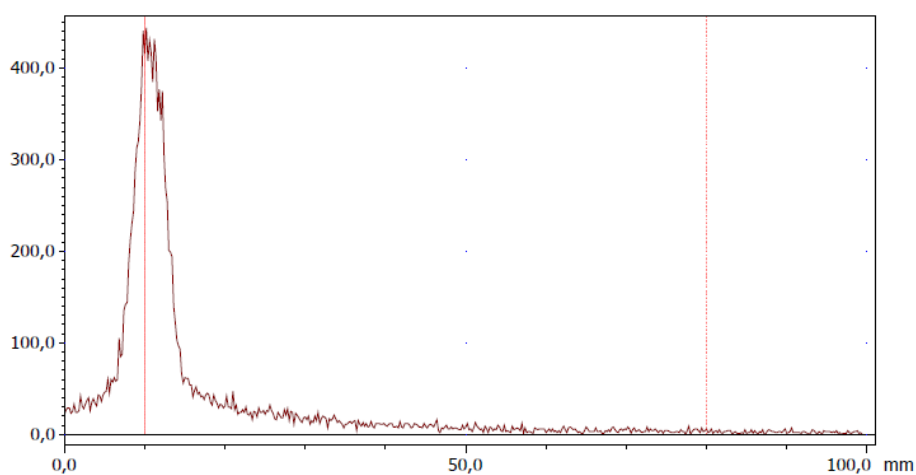

[ $^{89}\text{Zr}$ ]Zr-31

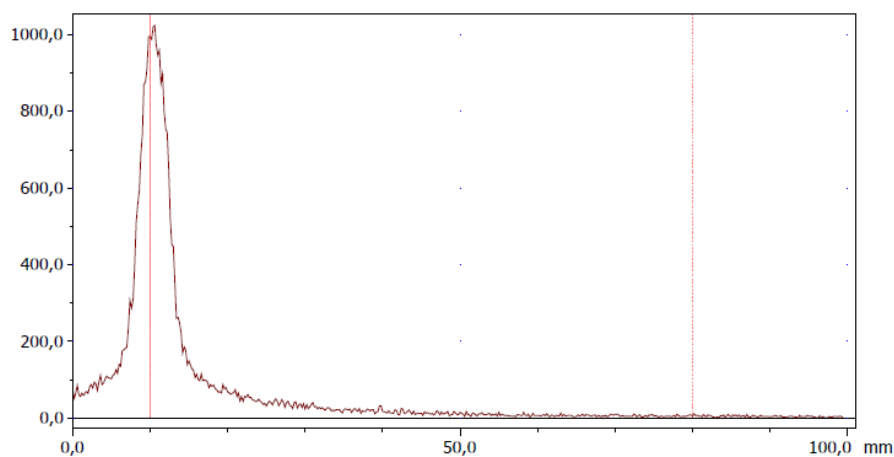

[ $^{89}\text{Zr}$ ]Zr-32
